# Supplementary material for: Waveguide and ultralow-threshold amplified spontaneous emission in an aligned ordered solid state based on a highly fluorescent twin-tapered bi-1,3,4-oxadiazole derivative
Source: Royal Society of Chemistry journal article supplement (doi:10.1039/c1cc10155b), 2011-01-01
Supplement: c1cc10155b.pdf [file c1cc10155b.pdf]

## Supporting Information

### Waveguide and Ultralow-Threshold Amplified Spontaneous Emission in Aligned Ordered Solid State Based on Highly Fluorescent Twin-tapered Bi-1,3,4-oxadiazole Derivative

Songnan Qu,<sup>a</sup> Yantao Li<sup>a</sup>, Lijun Wang<sup>a\*</sup>, Qipeng Lu,<sup>b</sup> and Xingyuan Liu<sup>a\*</sup>

<sup>a</sup>Key Laboratory of Excited State Processes, Changchun Institute of Optics, Fine Mechanics and Physics, Chinese Academy of Sciences, Changchun 130033 (P. R. China)

<sup>b</sup>State Key Laboratory of Applied Optics, Chinese Academy of Sciences, Changchun 130033 (P. R. China)

E-mail: [wanglj@ciomp.ac.cn](mailto:wanglj@ciomp.ac.cn); [xingyuanliu@hotmail.com](mailto:xingyuanliu@hotmail.com)

### Experimental

*General information:* BOXD-T3 was prepared following our previously published procedures. BOXD-T3 vacuum deposited film was prepared by high-vacuum ( $6 \times 10^{-5}$  Pa) thermal evaporation method. Film thicknesses were measured with an Ambios XP-1 surface profiler. PL spectra were collected using a Hitachi F-4500 spectrometer. UV-visible absorption spectra were recorded on a Shimadzu UV-3101PC spectrophotometer. Photoluminescence quantum yield in solution (excitation wavelength: 340 nm) was determined relative to a solution of quinine bisulfate in sulfuric acid aqueous solution ( $\Phi_F = 0.515$ ). Photoluminescence quantum yield in solid state is obtained in a calibrated integrating sphere (excitation wavelength: 340 nm). Fluorescence lifetimes were measured using FL920 time-corrected single photon counting (TCSPC) system. FE-SEM observations were taken with a Hitachi S-4800 apparatus. The POM and fluorescence microscopy images were carried out with an Olympus BX51TRF microscope. The light source for fluorescence microscopy observation was a mercury lamp with a fluorescent filter cube, which provides excitation in the range of 330-385 nm, and collects the emission at  $> 420$  nm. Intensity of the fluorescence emission was measured using the built-in CCD camera along with the associated software. X-ray

diffraction (XRD) was carried out with a Bruker Advance D8 X-ray diffractometer. ASE investigation was performed using a Nd:YAG laser with a repetition rate of 10 Hz and pulse duration of about 10 ns. BOXD-T3 cyclohexane solution was contained in 1 cm optical-path quartz cells. The excitation 355 nm laser source was normally focused onto the quartz cells or the film (the focused pumping stripe along the alignment of the film) in a 6 mm×0.6 mm stripe by a cylindrical lens. **The polarization direction of pumping source was perpendicular to the focused pumping stripe.** The emission spectra were detected using an Ocean Optics Maya 2000 Pro Fiber Optic Spectrometer. The laser power was detected by Newport 2936C laser power meter. **The film thickness could be controlled during the solution procession by modulating the concentrations and the solvents evaporating rates.**

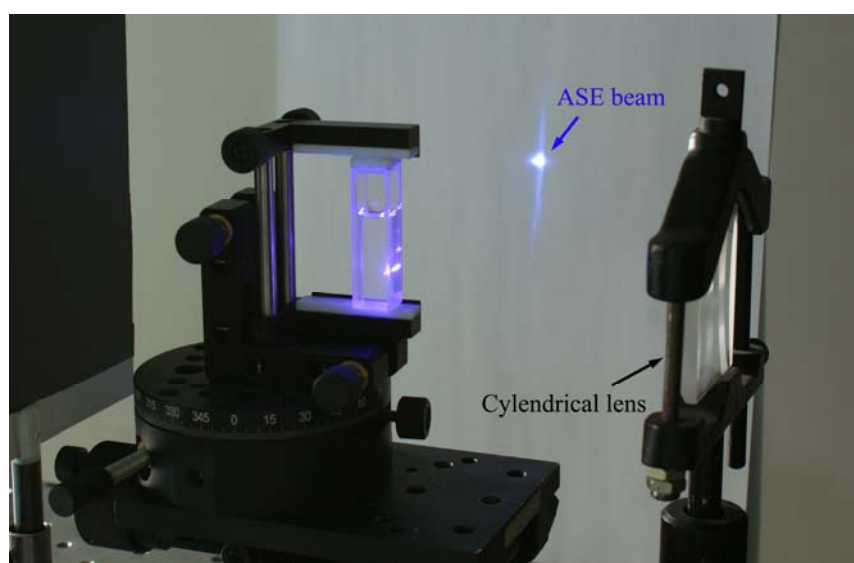

**Figure S1.** Photograph of the ASE from BOXD-T3 cyclohexane solution at  $1 \times 10^{-3}$  mol/L at the excitation power of  $220 \text{ kW/cm}^2$ .

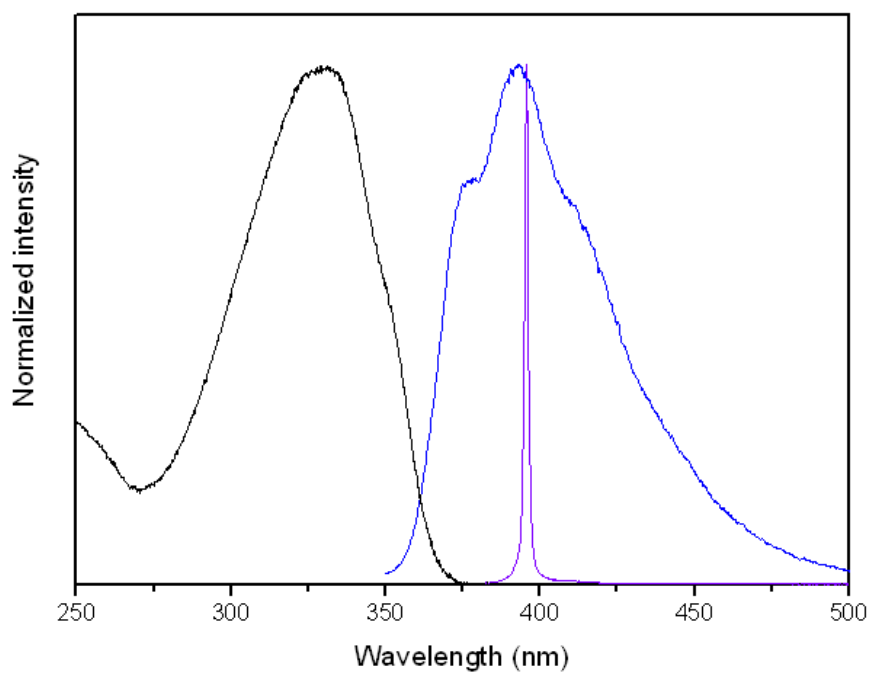

**Figure S2.** Normalized absorption (black), PL (blue) of BOXD-T3 in cyclohexane at  $5 \times 10^{-4}$  mol/L, and ASE (purple) spectra of BOXD-T3 in cyclohexane at  $1 \times 10^{-3}$  mol/L.

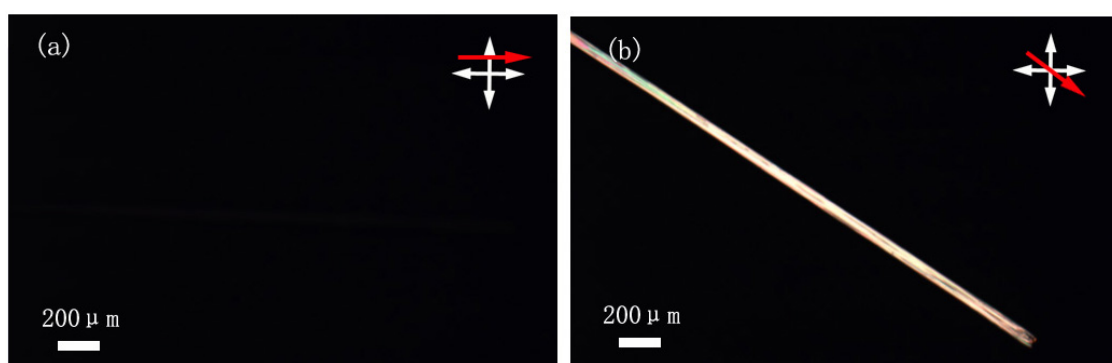

**Figure S3.** POM images of a solution processed microbelt of BOXD-T3. White crossed arrows illustrated the crossed-polarizers and red arrow illustrated the direction of the microbelt.

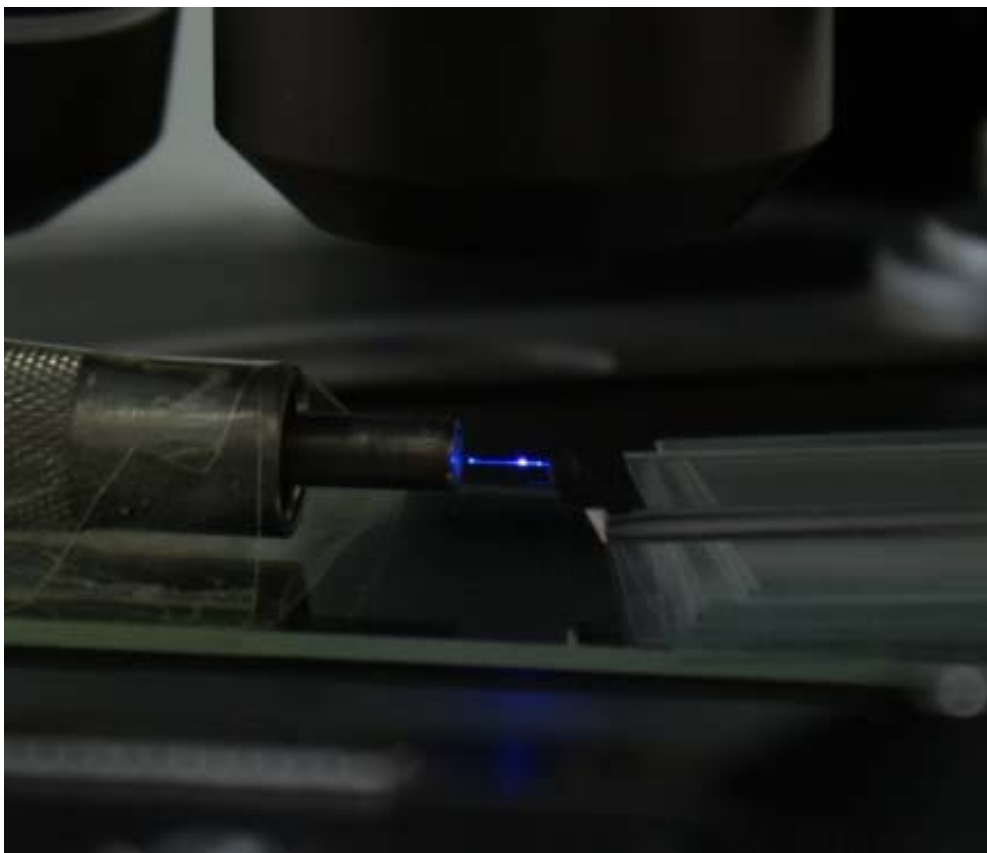

**Figure S4.** Photograph of the measurement of the self-waveguided behavior within a larger BOXD-T3 belt under Olympus BX51TRF microscope. The excitation UV lights (330-385 nm) was refined into a 80  $\mu\text{m}$  spot on the belt. The fiber-coupled CCD spectrograph was held stationary over one of the ends of the belt, which was moved by an attachable graduated mechanical stage.

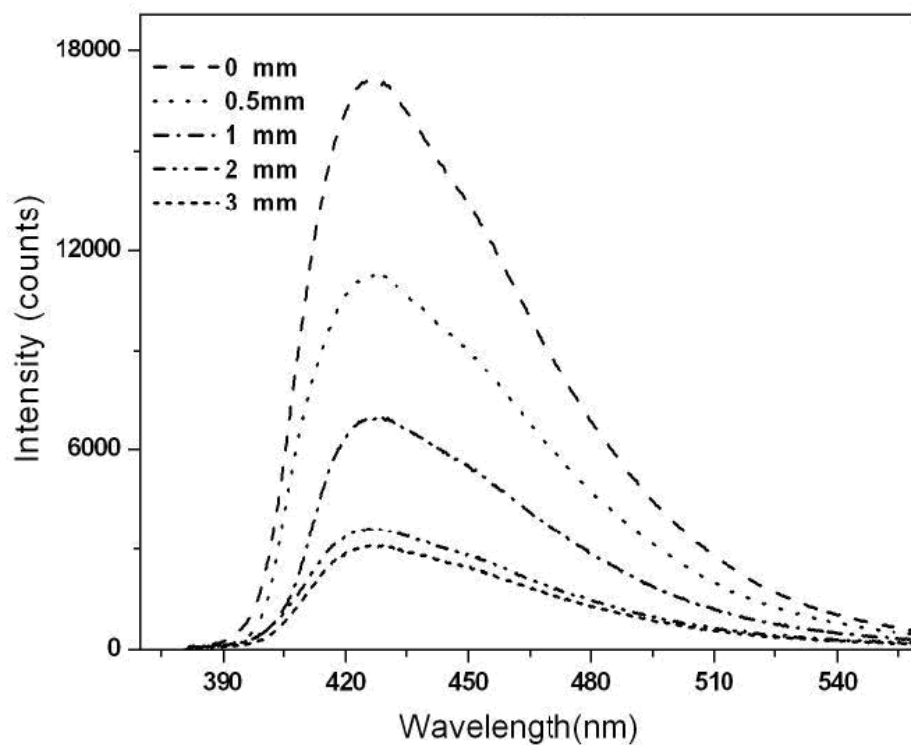

**Figure S5.** Spatially resolved PL spectra of the emission that is outcoupled at the tip of the large microbelt from a distance of 0-3 mm from the tip.

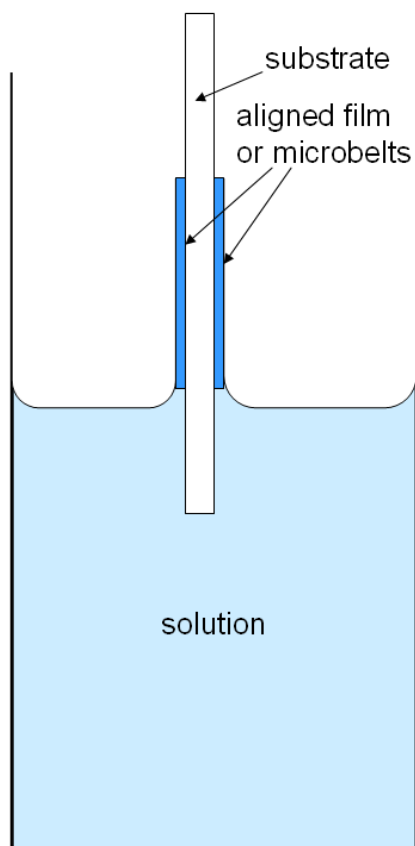

**Figure S6.** Schematic presentation of solution processed aligned microbelts or film in this work.

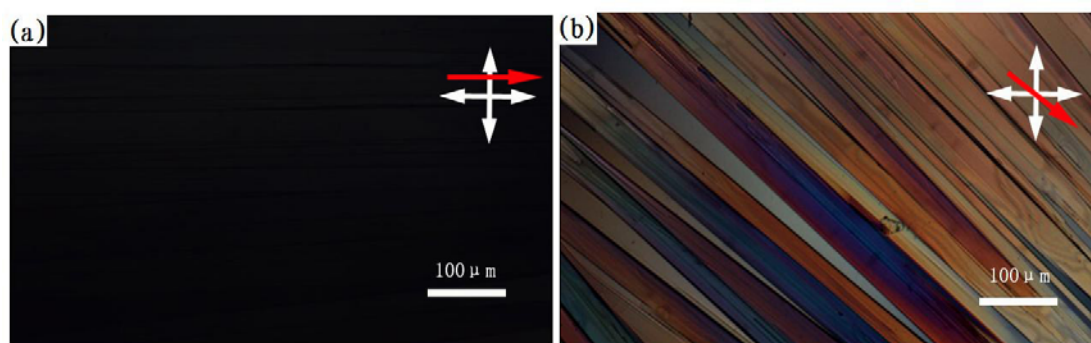

**Figure S7.** POM images of solution processed aligned microbelts of BOXD-T3 on glasses. White crossed arrows illustrated the crossed-polarizers and red arrow illustrated the direction of the aligned microbelts.

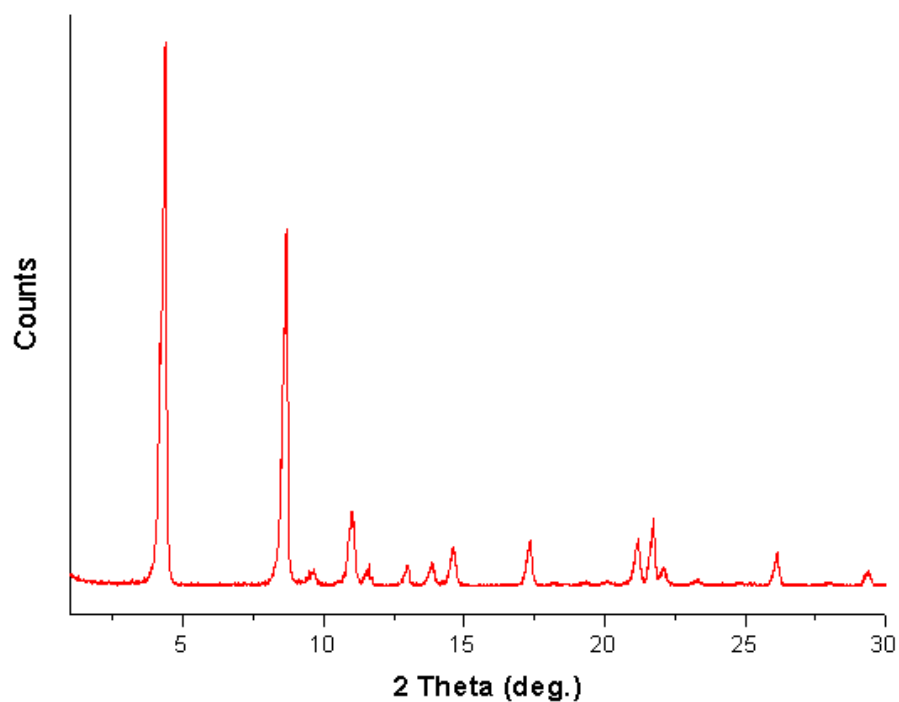

**Figure S8.** XRD profile of BOXD-T3 solution processed film.

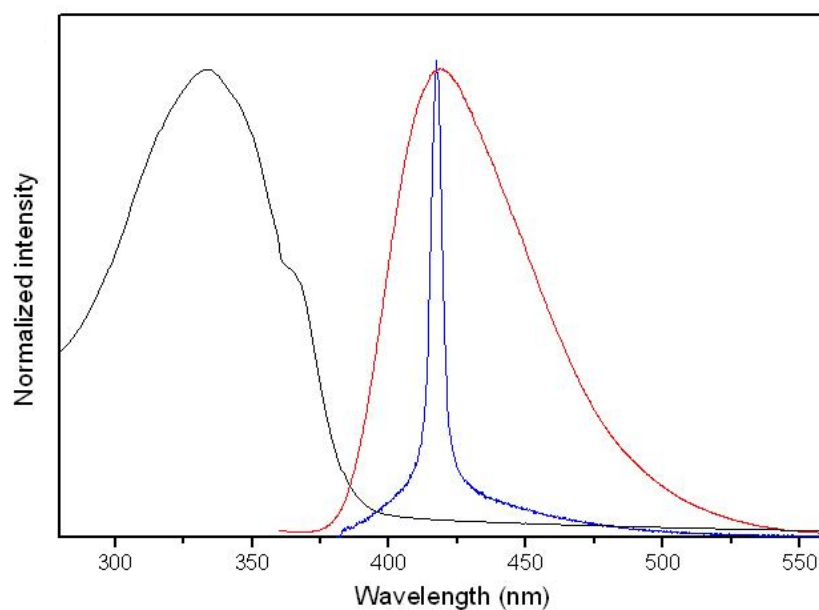

**Figure S9.** Normalized absorption (black), PL (red) and ASE (blue) spectra of BOXD-T3 in solution processed aligned ordered film.

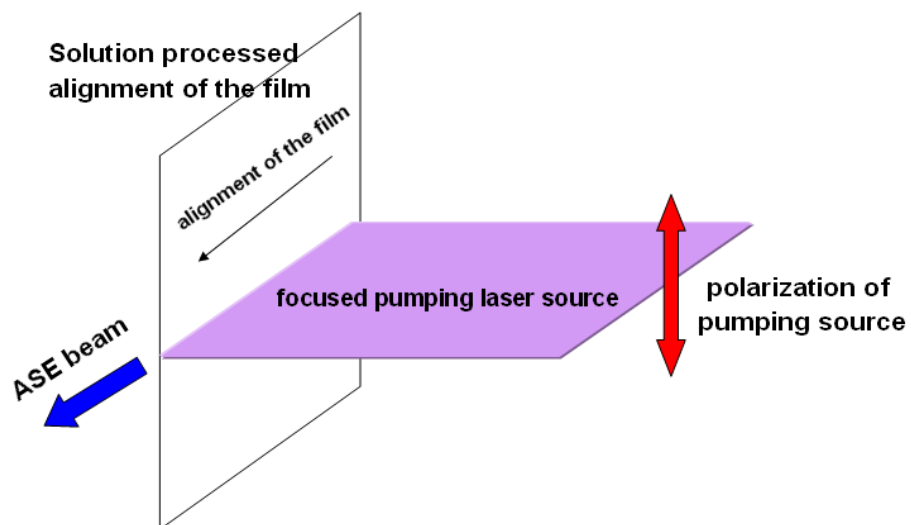

**Figure S10.** Schematic presentation of optical pumping experiment on BOXD-T3 solution processed aligned film.
